# Supplementary material for: Acute doxorubicin cardiotoxicity is associated with miR-146a-induced inhibition of the neuregulin-ErbB pathway
Source: PubMed Central journal article supplement — Cardiovasc Res. 2010 May 21;87(4):656–64. doi: 10.1093/cvr/cvq148 (PMC2920811; doi:10.1093/cvr/cvq148), 2010-05-21
Supplement: supp_cvq148_cvq148supp.pdf [file supp_cvq148_cvq148supp.pdf]

## Supplementary methods

### *Reagents*

Anti-ErbB4 antibody (111B2), Anti-pAkt antibody(#9271), anti-Akt antibody(#9272), anti-cleaved caspase3 antibody (#9661) , Anti-p53 antibody (1C12), Anti-GAPDH antibody (14C10) were obtained from Cell Signaling Technology (Beverly, MA, USA). Anti-ErbB2 (Neu) antibody (sc-284), anti-EGFR (sc-03) antibody and anti-Neuregulin (NRG) 1 $\beta$ 1 antibody (sc-347) were obtained from Santa Cruz Biotechnology (CA, USA). Anti-bcl-2 antibody (83-8B) was obtained from MBL (Nagoya, Japan). Recombinant NRG1- $\beta$ 1 (396-HB) was obtained from R&D Systems (MN, USA). Tetramethylrhodamine, ethylester, perchlorate (TMRE) was obtained from Molecular Probes (OR, USA). 3-(4,5-Dimethylthiazol-2-yl)-2,5-diphenyltetrazolium bromide (MTT) and Z-Leu-Leu-Leu-CHO (MG-132) were obtained from Sigma Aldrich (Saint Louis, MI, USA). Doxorubicin was obtained from WAKO (Osaka, Japan).

### *siRNA-mediated knock down of rat ErbB4*

The oligonucleotides used for siRNA of ErbB4 were the following:

ErbB4 siRNA1: sense, (GCCCUCAACCAGUUUCGUU) and antisense, (AACGAAACUGGUUGAGGGC).

ErbB4 siRNA2: sense, (GGACCUGACAACUGUACAA) and antisense, (UUGUACAGUUGUCAGGUCC).

Randomly shuffled form of ErbB4 siRNA1 were used as control. Every siRNA construct was made by the use of pSINsi-mU6 vector (Takara Bio Inc.) and the siRNA producing constructs were introduced to lenti-virus vector plasmid and transduced to

cardiac myocytes. Two or Three days after the transduction, cells were used for analysis.

***RNA extraction and quantitative real-time PCR for mRNA***

Total RNA was isolated using TRIzol® reagent (Invitrogen) and cDNA was synthesized by using SuperScript II reverse transcriptase (Invitrogen). For real-time PCR, the reaction was performed with a SYBR Green PCR master mix (Applied Biosystems), and the products were analyzed using a thermal cycler (ABI Prism 7900HT sequence detection system). The levels of GAPDH transcripts were used to normalize cDNA levels. Gene-specific primers were shown as follows.

rat ErbB4 sense: AACCAGCACCATACCAGAGG

rat ErbB4 antisense: TTCATCCAGTTCTGCTCGTG

rat NRG1 $\beta$  sense: CAGAAGAAGCCAGGGAAGTC

rat NRG1 $\beta$  antisense: TGGCAACGATCACCAGTAAA

rat GAPDH sense; TTGCCATCAACGACCCCTTC

rat GAPDH antisense; TTGTCATGGATGACCTTGGC

## SUPPLEMENTARY FIGURE LEGENDS

### Supplementary Fig.1

Representative western blotting results for ErbB4 in the hearts of mice at the indicated time points after intra-peritoneal injection of Dox (20 mg/g). Because the antibody against ErbB4 recognizes the C-terminus of ErbB4, full length of ErbB4 is recognized at 180 kD and cleaved-ErbB4 is recognized at 80 kD. Note that cleaved-ErbB4 was not seen at 80 kD. GAPDH was used as a loading control.

### Supplementary Fig.2

- A. Three potential binding sites of miR-146a in the 3'UTR of ErbB4. (Hsa: human, Ptr: Chimpanzee, Mmu: mouse, Rno: rat).
- B. The expression of miR-146a in NRCMs and cardiac fibroblasts. Values are the means  $\pm$  S.E. of 3 independent experiments. The mean values of miR-146a, normalized with U6 was set at 10.0.
- C. The expression of miR-133a in NRCMs and cardiac fibroblasts. Values are the means  $\pm$  S.E. of 3 independent experiments. The mean values of miR-133a, normalized with U6 was set at 10.0.
- D. MicroRNAs were transduced into NRCMs using lentivirus vectors. The transduction efficiency, which is shown using GFP in the right-hand panel, was always over 90%.
- E. Representative western blotting results for ErbB4 in cardiac myocytes and 293T cells, into which miR-control or miR-146a had been introduced. GAPDH was used as a control.
- F. Human ErbB4 3'UTR firefly-luciferase (F-luc) activity normalized using renilla reniformis luciferase (R-luc). About 500 bp fragments were amplified from human cDNA and inserted into a pMIR-REPORT vector. Reporters (0.1  $\mu$ g) were co-transfected with miR-control or miR-146a (0.5  $\mu$ g) into 293T cell. The mean values of miR-control were set at 100%. Values are the means  $\pm$  S.E. of 8 independent experiments ( $\#p<0.05$ ,  $+p=0.06$ ).
- G. Rat ErbB4 3'UTR F-luc activity normalized using R-luc. About 500 bp fragments were amplified from rat cDNA and inserted into a pMIR-REPORT vector. Reporters (0.1  $\mu$ g) were co-transfected with miR-control or miR-146a (0.5  $\mu$ g) into 293T cells. The mean values of miR-control were set at 100%. Values are the means  $\pm$  S.E. of 8 independent experiments ( $\#p<0.05$ ,  $##p<0.01$ ).
- H. Wild-type and mutant sequence of miR-146a binding site 3 of ErbB4 3'UTR.

### Supplementary Fig.3

- A. Microscopy images of NRCMs transduced with miR-control or miR-146a with or without 1

μM Dox for 24 h.

- B. Fluorescence microscopy images of NRCMs treated with or without 1 μM Dox for 24 h and stained with TMRE dye, as described in the materials and methods.

#### Supplementary Fig.4

- A. Flow cytometric analysis of TMRE in miR-control or miR-146a over-expressing NRCMs infected with either lacZ or ErbB4 with or without Dox treatment for 24 h.
- B. The ratio of TMRE intensity with Dox treatment compared with without Dox for each group. Values are the means ± S.E. of 3-4 independent experiments (#p<0.05).

#### Supplementary Fig.5

- A. Scheme of the luciferase 'decoy' gene. 3'UTR of firefly luciferase was modified to include 3 or 6 tandem sequences complementary to miR-146a separated by 3 nucleotides spacers
- B. Control-decoy (0.1 μg) was co-transfected with miR-control and/or miR-146a or miR-133a expression vectors (total 0.5 μg) into 293T cells, and F-luc activity was measured and normalized using R-luc. The mean values of miR-control were set at 100%. Values are the means ± S.E. of 4 independent experiments.
- C. Decoy-miR-146a×3 (0.1 μg) was co-transfected with miR-control and/or miR-146a or miR-133a expression vectors (total 0.5 μg) into 293T cells, and F-luc activity was measured and normalized using R-luc. The mean values of miR-control were set at 100%. Values are the means ± S.E. of 4 independent experiments (#p<0.05 vs miR-control).
- D. Decoy-miR-146a×6 (0.1 μg) was co-transfected with miR-control and/or miR-146a or miR-133a expression vectors (total 0.5 μg) into 293T cells, and F-luc activity was measured and normalized using R-luc. The mean values of miR-control were set at 100%. Values are the means ± S.E. of 4 independent experiments (#p<0.05 vs miR-control).
- E. The same amounts (0.5 μg) of plasmids (control-decoy, decoy-miR-146a×3, or decoy-miR-146a×6) were transfected into NRCMs, and F-luc activity was measured and normalized using R-luc. The reduction in luciferase activity was considered as the effect of the 'decoy' gene. The mean level of luciferase activity in the control-decoy was set at 100%. Values are the means ± S.E. of 4 independent experiments (#p<0.05 vs control-decoy).
- F. Scheme of the GFP 'decoy' gene. The 3'UTR of GFP was modified to include 3 or 6 tandem sequences complementary to miR-146a separated by 3 nucleotides spacers.
- G. Flow cytometric measurement of FITC intensity in NRCMs, infected with GFP-control-decoy, GFP-decoy-miR-146a×3, or GFP-decoy-miR-146a×6 using lentivirus vectors. The reduction in FITC intensity was considered as the effect of the 'decoy' gene.
- H. The sequence of anti-miR-146a used in constructing 'decoy' genes.

- I. Flow cytometric analysis of TMRE in NRCMs infected with control or decoy gene with or without Dox treatment for 24 h.
- J. The ratio of TMRE intensity with Dox treatment compared with without Dox for each group. Values are the means  $\pm$  S.E. of 6 independent experiments ( $\#p<0.05$ ).

Supplementary Fig.6

- A. Western blotting results for NRG1 $\beta$  in NRCMs stimulated with 1  $\mu$ M Dox for the indicated time periods. Full means full length, and CTF means C terminus fraction. GAPDH was used as a loading control.
- B. Quantitative real-time PCR analysis for NRG1 $\beta$  in miR-control or miR-146a over-expressing NRCMs. The mean values of miR-control normalized using GAPDH, were set at 100%.
- C. Western blotting results for NRG1 $\beta$  in miR-control or miR-146a over-expressing NRCMs stimulated with 1  $\mu$ M Dox for the indicated time periods. GAPDH was used as a loading control.
- D. Quantitative real-time PCR analysis for NRG1 $\beta$  in NRCMs transduced with control-siRNA or ErbB4-siRNAs. The mean values of control-siRNA normalized using GAPDH were set at 100%.
- E. Western blotting results for NRG1 $\beta$  in NRCMs transduced with control-siRNA or ErbB4-siRNAs stimulated with 1  $\mu$ M Dox for the indicated time periods. GAPDH was used as a loading control.

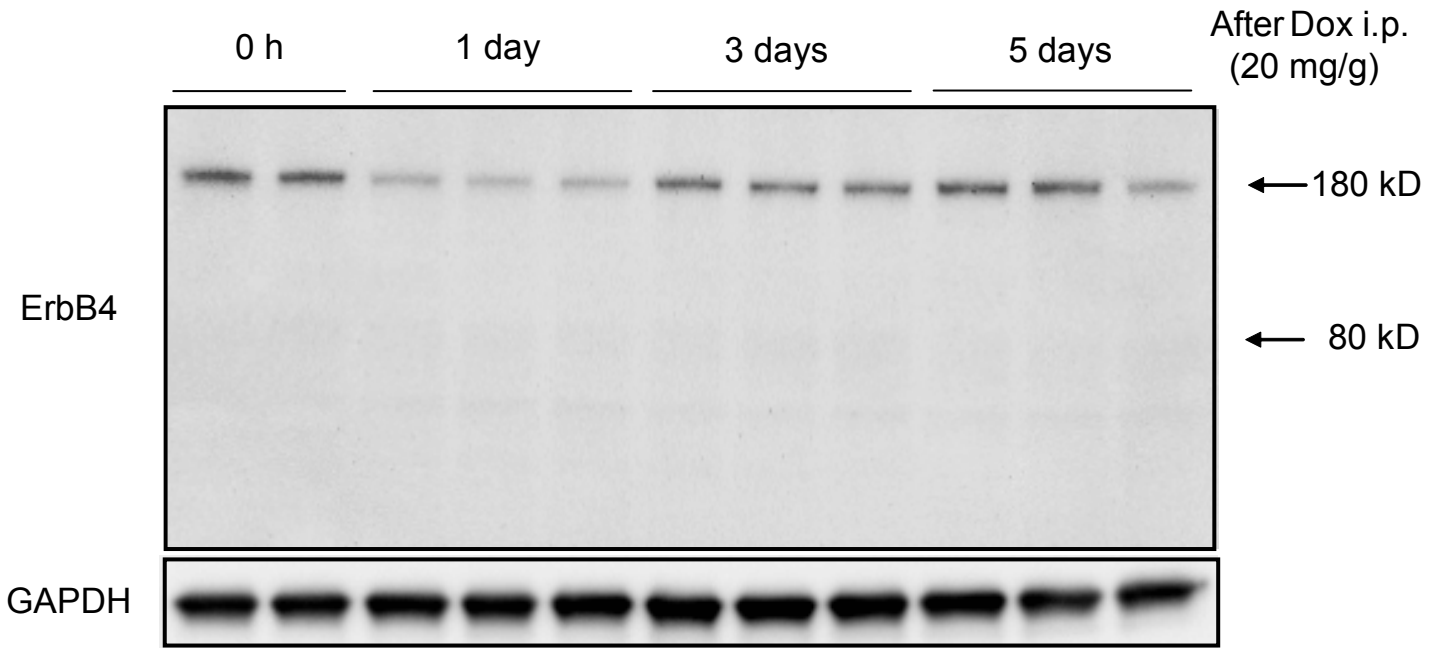

Supplementary Fig.1

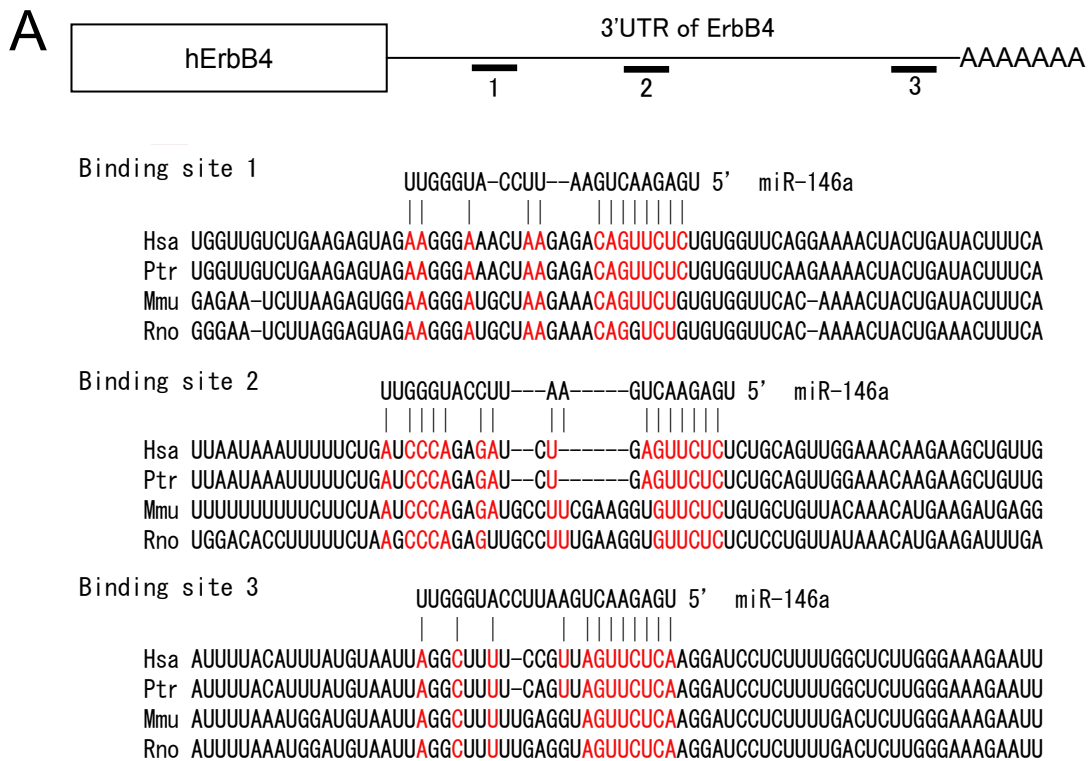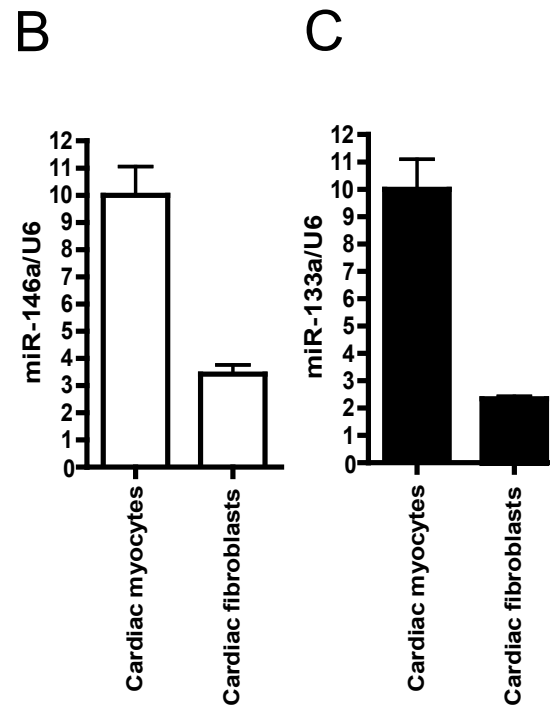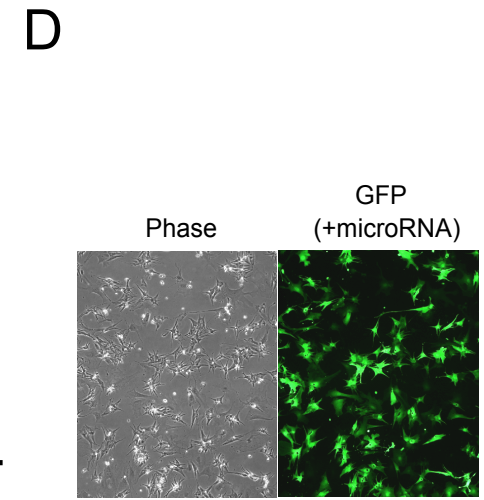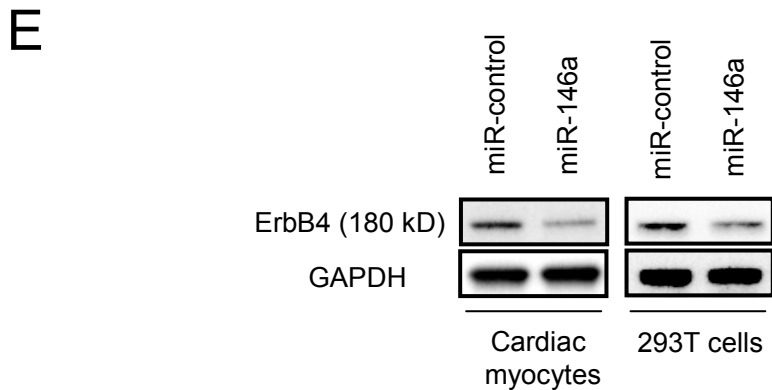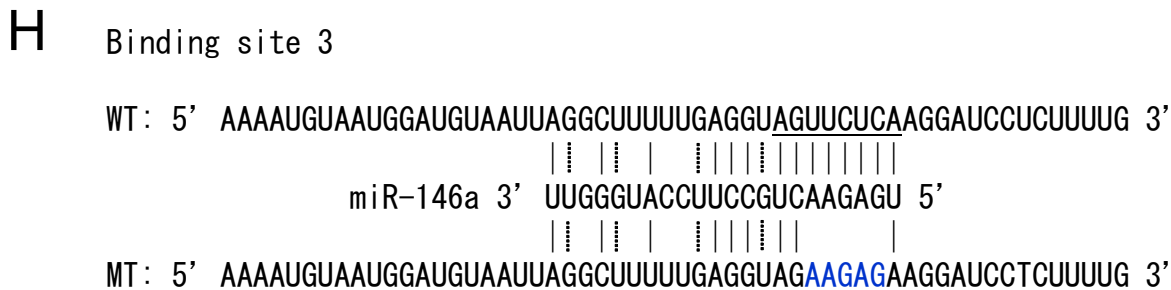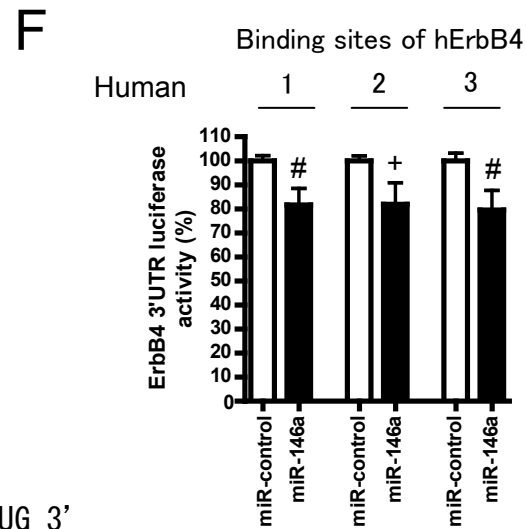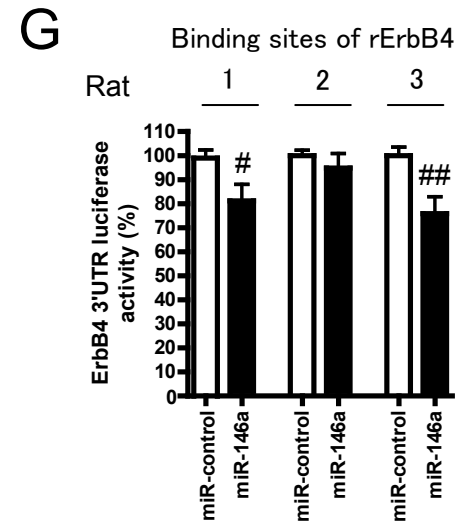

Supplementary Fig.2

A

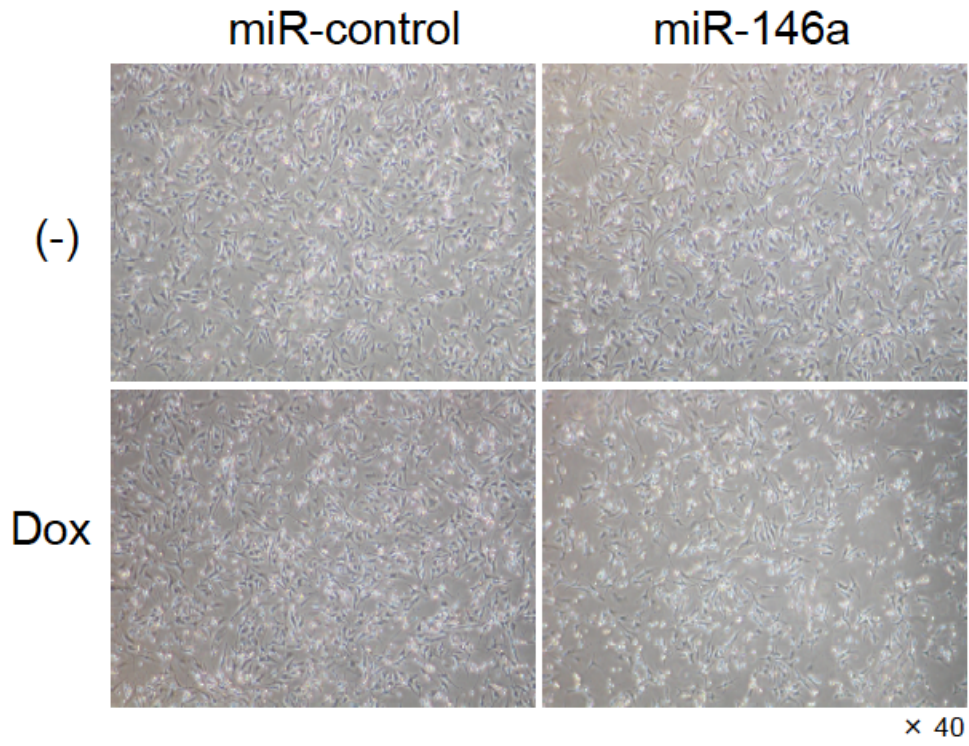

B

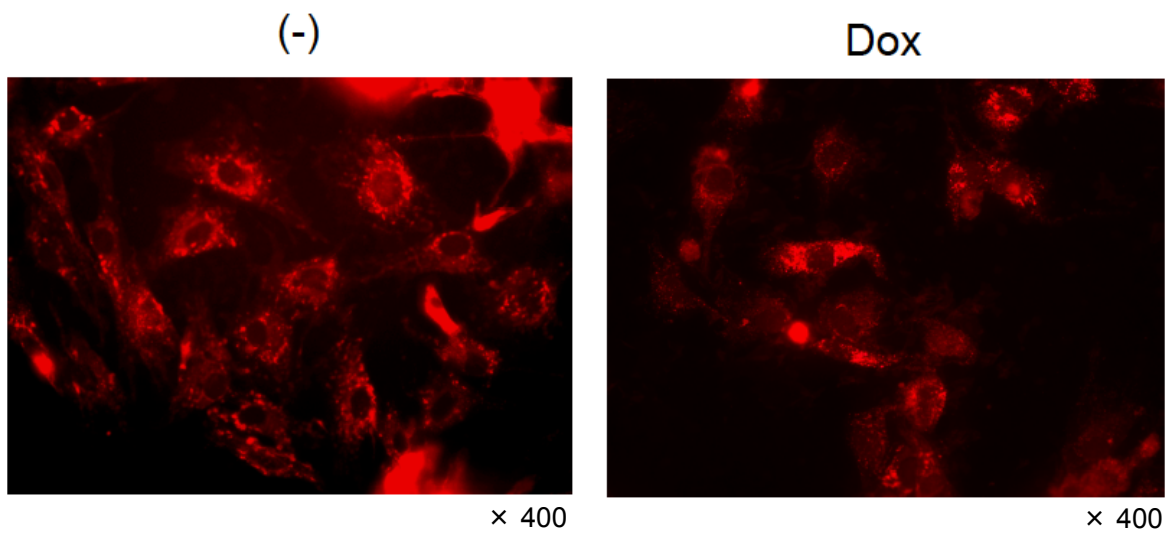

Supplementary Fig.3



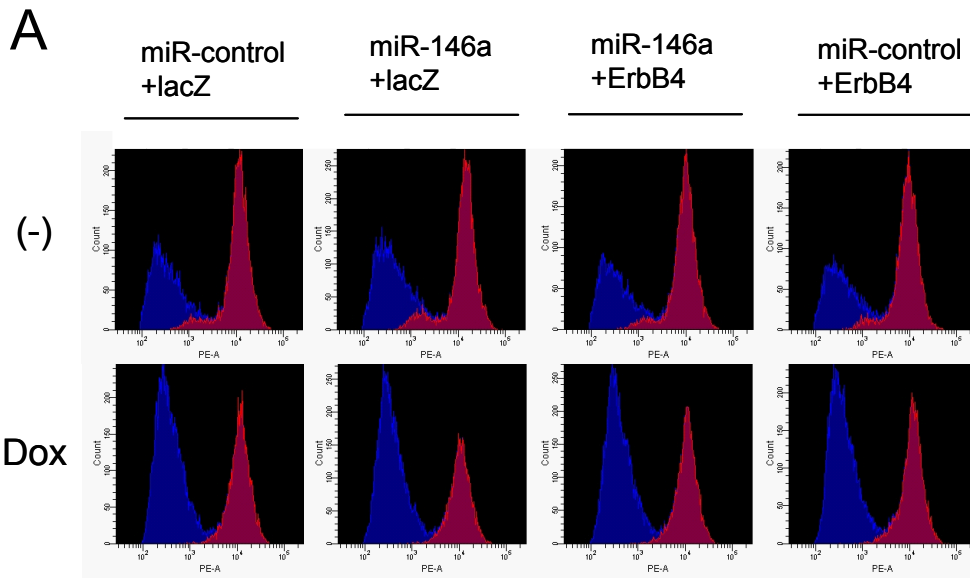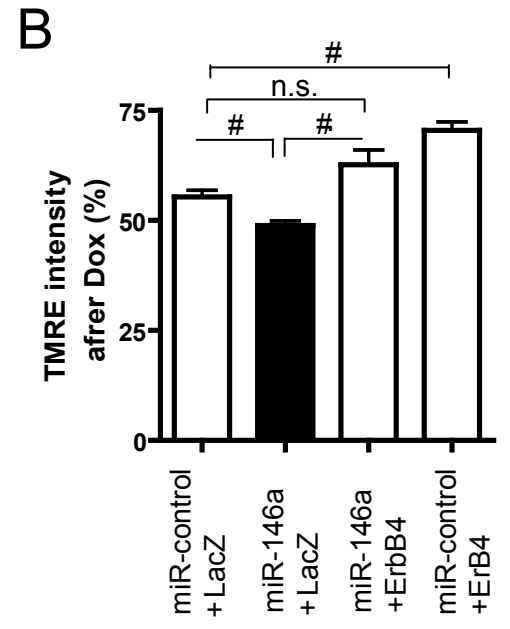

Supplementary Fig.4

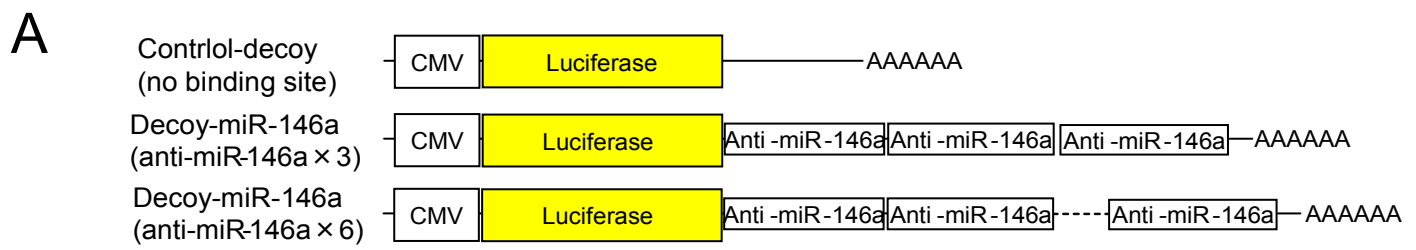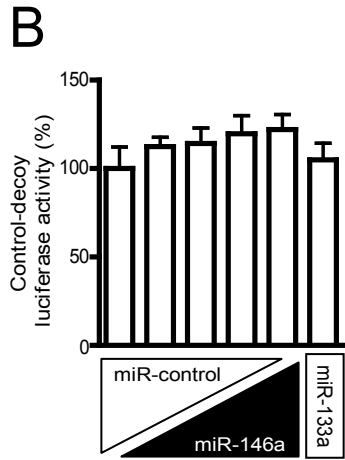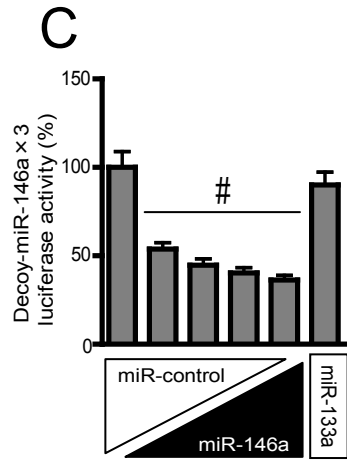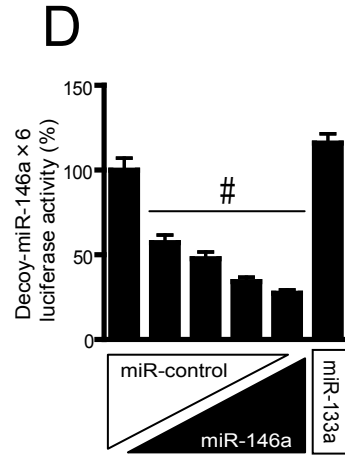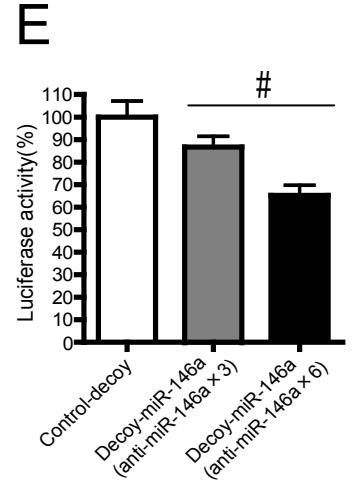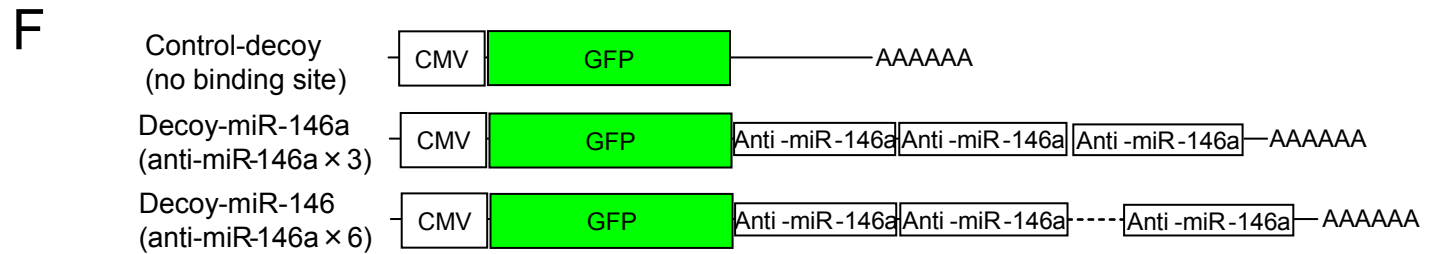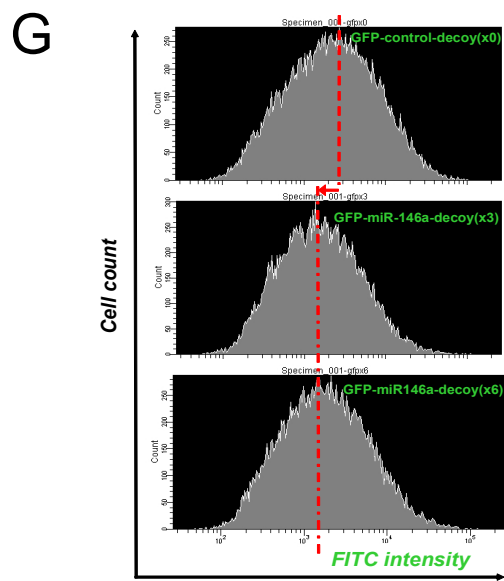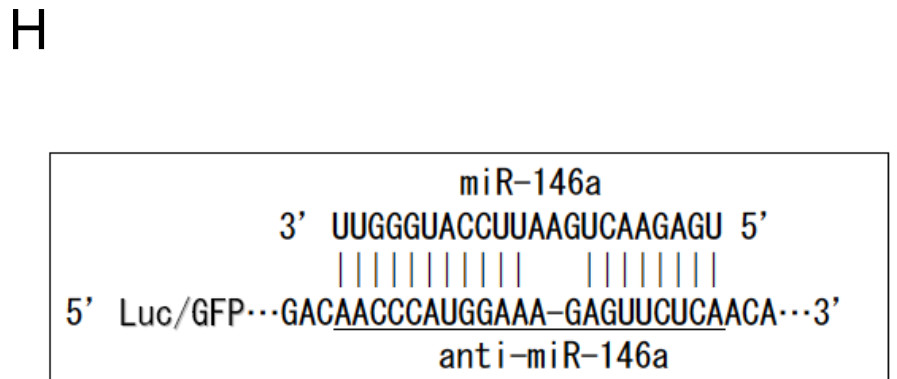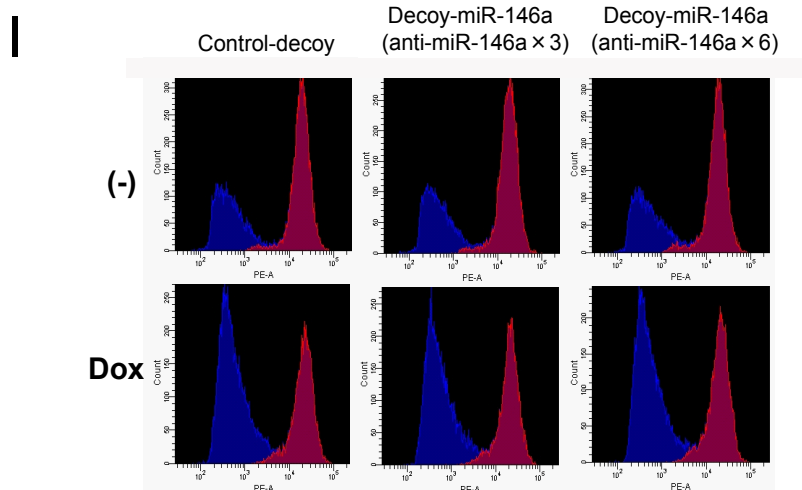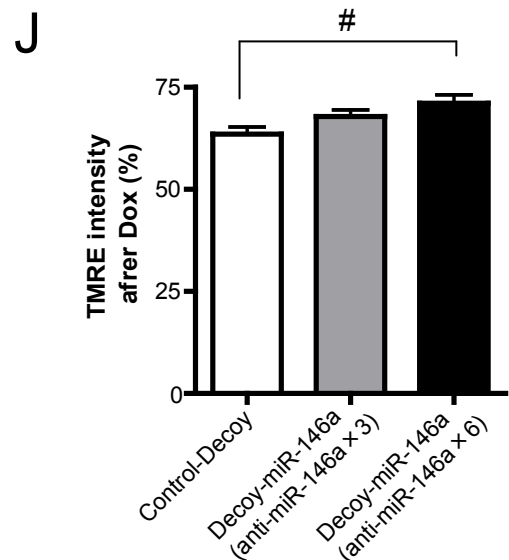

Supplementary Fig.5

**A**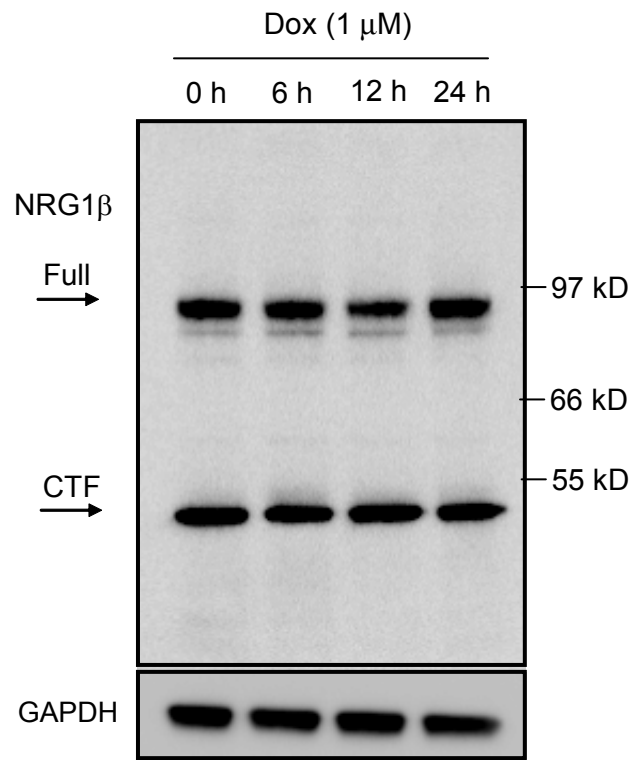**B**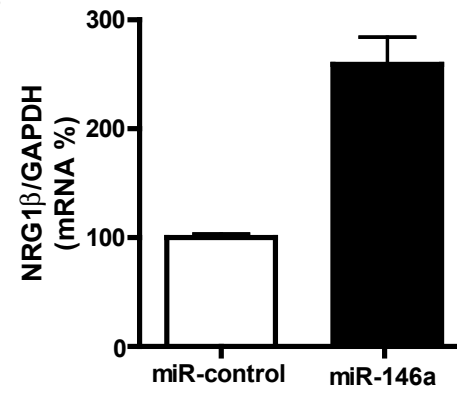**C**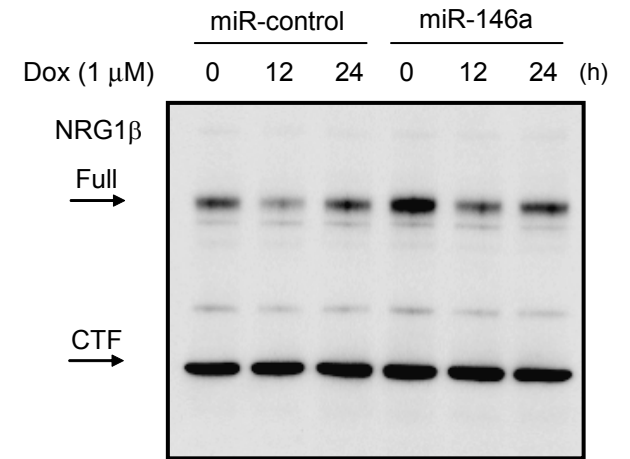**D**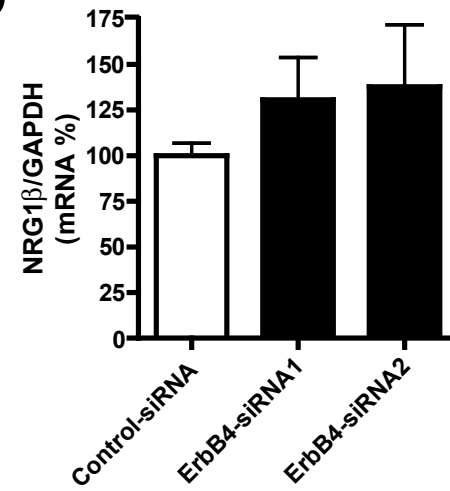**E**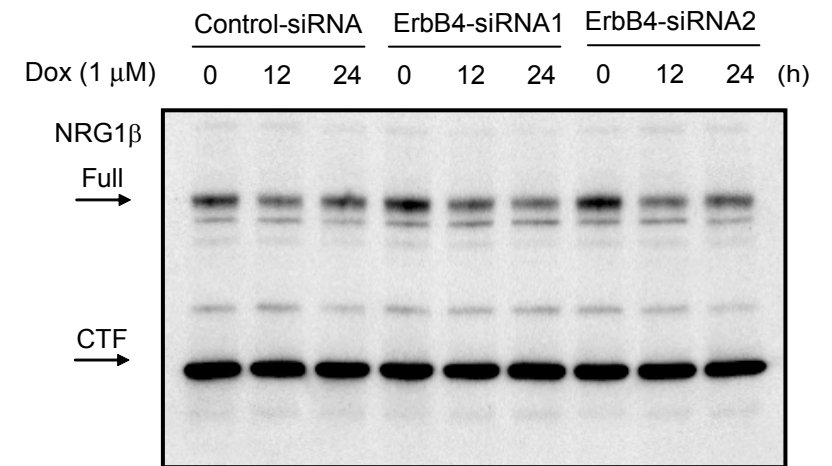

Supplementary Fig.6
